# Supplementary material
Source: publisher site journal article supplement (https://www.dovepress.com/article/221242)
Supplement: Supplementary file 1 [file get_supplementary_file.php]

**Paliperidone ER study (NCT00086320)**

| Site/s                                                                                                                                                                                                                                                                                                                                                                                                                                                                                                                         | IRB/IEC                                                                                                                                                                  |
|--------------------------------------------------------------------------------------------------------------------------------------------------------------------------------------------------------------------------------------------------------------------------------------------------------------------------------------------------------------------------------------------------------------------------------------------------------------------------------------------------------------------------------|--------------------------------------------------------------------------------------------------------------------------------------------------------------------------|
| <p>SSK Ankara Hospital Psychiatry Clinic Diskapi<br/>Ankara 06110 Turkey; Dokuzeylul University Medical Faculty Psychiatry Department Balcova Izmir 35340 Turkey; Ankara University Medical Faculty Psychiatry Department Ankara 06100 Turkey; Ankara Numune Hospital<br/>Psychiatry Clinic Samanpazari, Ankara 06100 Turkey; Sisli Etfal Training and Research Hospital Psychiatry Clinic Sisli, Istanbul Turkey; Istanbul University, Istanbul Medical Faculty Hospital Psychiatry Department Capa Istanbul 34039 Turkey</p> | <p>Central EC<br/>Meral Tuncer, Prof., MD, Chairman<br/>T.C. Saglik Bakanligi Ilac ve Eczacilik Genel Müdürlüğü<br/>Cankiri Cad. No. 57 Diskapi Ankara<br/>Turkey</p>    |
| <p>Mental Health Care Centre Department of Psychiatry Tvaika street 2 Riga LV-1005 Latvia; Psychoneurological Hospital of Strenci Valkas street 11 Valmiera region Strenci LV-4730 Latvia;<br/>Psychoneurological Hospital of Jelgava Department No. 12, Filozofu street 69, Jelgava LV-3008. Latvia</p>                                                                                                                                                                                                                       | <p>The Ethics Committee of Clinical Trials on Medicinal Products<br/>Nills Poritis, MD, Chairman of the Board<br/>11, Novembra krastmala 29 Riga, LV-1050<br/>Latvia</p> |
| <p>Siauliai Mental Hospital, M.K. Ciurlionio 12, Siauliai 76231 Lithuania; Vilnius Psychiatry Hospital, Department of Psychiatry, Parko 15 Vilnius 11205, Lithuania; Vilnius Mental Health Center, Vasaros 5 Vilnius 10309, Lithuania; Ziegdriai Psychiatric Hospital, Ziegdriai Kaunas district, Kaunas 53136. Lithuania; Klaipeda Mental Hospital Bangu 6a Klaipeda 91251, Lithuania</p>                                                                                                                                     | <p>Lithuanian Bioethics Committee, Gefenas, Eugenijus, Assoc.Prof.,<br/>Chairman, Vilniaus 33-230<br/>01119 Vilnius<br/>Lithuania</p>                                    |
| <p>Spitalul Clinic de Psihiatrie Prof. Dr. Alex. Obregia<br/>Pavilionul 10. Sos. Berceni nr. 10-12, sector 4<br/>Bucuresti 041914 Romania; Spitalul Clinic de Psihiatrie si Neurologie Str. Louis Pasteur nr. 26 Oradea 410154 Romania; Spitalul de Psihiatrie si Masuri de<br/>Siguranta Jebel, Str. Campului nr. 1,Com. Jebel, jud. Timis 307235 Romania;</p>                                                                                                                                                                | <p>National Ethics Committee, George Litaczek MD PhD<br/>Str. Av. Sanatescu no. 48 District 1, code 71342 Bucharest, Romania</p>                                         |
| <p>Holy Family Hospital, Room No.20, Private OPD<br/>Okhla road,New Delhi, India – 110 065</p>                                                                                                                                                                                                                                                                                                                                                                                                                                 | <p>The Medical Research and Ethics<br/>Committee Lobo, J, MD, Chairman Holy Family Hospital<br/>New Delhi, India – 110 065</p>                                           |

| Site/s                                                                                                                                                                                     | IRB/IEC                                                                                                                                                                                                       |
|--------------------------------------------------------------------------------------------------------------------------------------------------------------------------------------------|---------------------------------------------------------------------------------------------------------------------------------------------------------------------------------------------------------------|
| Shanti Nursing Home Kanchanwadi ,Paithan Road, Aurangabad, India – 431 005                                                                                                                 | Sanjeev Saoji, MD , D.P.M, Chairman Ethics Committee<br>Shanthi Nursing Home Kanchanwadi, Paithan Road,<br>Aurangabad, India – 431 005                                                                        |
| Psychiatric Center Janta Colony<br>Jaipur, India – 302 004                                                                                                                                 | Madan, BR, MD ,Chairman Ethics Committee<br>SMS Medical College Jaipur, India – 302 004                                                                                                                       |
| Trichur Medical College Department of Psychiatry Mulankunnathukavu<br>Trichur, India – 680 596                                                                                             | Iyer, Krishan, MD, Chairman Institutional Ethics Committee<br>Mulankunnathukavu<br>Trichur, India – 680 596                                                                                                   |
| Vidyasagar Institute of Mental Health and Neurosciences (VIMHANS)<br>No. 1, Institutional Road Nehrunagar<br>New Delhi, India – 110 065                                                    | Ethics Committee<br>Verma, SK, Prof, MD, Chairman Vidyasagar Institute of Mental Health and<br>Neurosciences (VIMHANS)<br>No. 1, Institutional Road Nehrunagar<br>New Delhi, India – 110 065                  |
| Government Hospital for Mental Care<br>Department of Psychiatry, China Waltair, Vishakhapatnam, India – 530 017                                                                            | Institutional Ethics Committee Rao, Surya, K, MD, Chairman<br>Government Hospital for Mental Care, China Waltair<br>Vishakhapatnam, India – 530 017                                                           |
| Asha Hospital, 298, Road No. 14<br>banjara Hills, Hyderabad, India - 500034                                                                                                                | Nagabhushanam, MS, Chairman<br>Asha Hospital, 298, Road No. 14<br>banjara Hills, Hyderabad, India - 500034                                                                                                    |
| S.V. Medical College Department of Psychiatry Tirupati, India – 517 507                                                                                                                    | Institutional Ethics Committee Reddy, Rami, KIAS, Chairman<br>S.V. Medical College Tirupati, India – 517 507                                                                                                  |
| King George Medical University and GM & Associated Hospital<br>Dept. of Psychiatry, Lucknow, India – 226 003                                                                               | KGMU Ethics Committee<br>Nag, Devika, Dr MD, Chairman<br>King George Medical University and<br>GM & Associated Hospital<br>Lucknow, India – 226 003                                                           |
| R.N. Cooper Hospital and G.S., Medical College, Department of Psychiatry<br>Located at V.N. Desai Hospital, Municipal General Hospital<br>Ward No-10, Santacruz E, Mumbai, India – 400 055 | D.R.R.N. Cooper Hospital and G.S.<br>Medical College Ethics Committee, Gawde, SS, Dr DVD, DHA, Chairman<br>Located at V.N. Desai Hospital, Municipal General Hospital<br>Santacruz E, Mumbai, India – 400 055 |

| Site/s                                                                                                                                                                                                                                                                                                                                                                                                                                                                                                                                                                                                                                                                                                                                                                                                                         | IRB/IEC                                                                                                                                                                                           |
|--------------------------------------------------------------------------------------------------------------------------------------------------------------------------------------------------------------------------------------------------------------------------------------------------------------------------------------------------------------------------------------------------------------------------------------------------------------------------------------------------------------------------------------------------------------------------------------------------------------------------------------------------------------------------------------------------------------------------------------------------------------------------------------------------------------------------------|---------------------------------------------------------------------------------------------------------------------------------------------------------------------------------------------------|
| <p>Lake Charles Clinical Trials<br/>2770 3rd Avenue, Suite 340<br/>Lake Charles, LA 70601, U.S.A.</p>                                                                                                                                                                                                                                                                                                                                                                                                                                                                                                                                                                                                                                                                                                                          | <p>Lake Charles Memorial Hospital IRB<br/>Gerald W. Bryant, MSN, RN, Chairman<br/>1701 Oak Park Blvd.<br/>Lake Charles, LA 70601<br/>U.S.A.</p>                                                   |
| <p>Synergy Clinical Research<br/>1908 Sweetwater Road<br/>National City, CA 91950<br/>U.S.A; CORE Research Inc. 2020 Tally Rd Leesberg, FL 34748 U.S.A;<br/>FutureSearch Trials<br/>4200 Marathon Blvd, Suite 200 Austin, TX 78756<br/>U.S.A; International Clinical Research<br/>Associates, LLC, 1601 Rolling Hills Drive, Suite 201<br/>Richmond, VA 23229, U.S.A; Linden Research Consultants, LLC, 5801 N.<br/>Broadway<br/>Suite 410, Oklahoma City, OK 73118. U.S.A; CNRI – Los Angeles, 8309<br/>Telegraph Road, Pico Rivera, CA 90660 U.S.A; Clinical Research Inc. 2639<br/>Miami Street<br/>St. Louis, MO 63118, U.S.A; South Coast Clinical Trials, Inc.<br/>515 South Beach Blvd. Suite K, Anaheim, CA 92804 U.S.A; CNRI – San<br/>Diego, LLC<br/>Black Mountain Road, Suite 100, San Diego, CA 92126, U.S.A.</p> | <p>Goodwyn IRB<br/>Robert C. Baumiller, PhD, Chairman<br/>5090 Elmcrest Lane, Suite 100A<br/>Cincinnati, OH 45242<br/>U.S.A.</p>                                                                  |
| <p>California Clinical Trials<br/>1509 Wilson Terrace<br/>55 Wing, Main Floor<br/>Glendale, CA 91206<br/>U.S.A.</p>                                                                                                                                                                                                                                                                                                                                                                                                                                                                                                                                                                                                                                                                                                            | <p>Biomedical Research Institute of Biomedical Research Institute of<br/>America Richard M. Sullivan, Dr, Chairman 2525 camino del Rio South<br/>Suite 300 San Diego, California 92108 U.S.A.</p> |
| <p>Center for Psychiatric Advancement<br/>7 Prospect Street Nashua, NH 03060<br/>U.S.A.</p>                                                                                                                                                                                                                                                                                                                                                                                                                                                                                                                                                                                                                                                                                                                                    | <p>State of New Hampshire Department of Health and Human Services Bureau<br/>of<br/>Behavioral Health, Karen Reed, MS, CES, Chairman<br/>105 Pleasant St. Concord, NH 03301 U.S.A.</p>            |
| <p>Healthquest Clinical Trials, Behavioral and Research Medicine, LLC<br/>1000 South Anaheim Blvd. Suite 204 Anaheim, CA 92805, U.S.A.</p>                                                                                                                                                                                                                                                                                                                                                                                                                                                                                                                                                                                                                                                                                     | <p>Aspire IRB 9628 Campo Rd.<br/>Suite S. San Diego, CA 91977, U.S.A.</p>                                                                                                                         |
| <p>St. Joseph's Medical Center, 330 First Capitol Drive<br/>Suite 390, St. Charles, MO 63301, U.S.A.</p>                                                                                                                                                                                                                                                                                                                                                                                                                                                                                                                                                                                                                                                                                                                       | <p>St. Joseph Health Center, Institutional<br/>Review Committee, James C. Freeman, MD, Chairman<br/>300 First Capitol Dr. St. Charles, MO 63301 U.S.A.</p>                                        |

**Paliperidone palmitate 1-monthly study (NCT00111189)**

| Site (s)                                                                                                                                                                                                                                                                                                                                                                                                                                                                                                                                                                                                                                                                                                                                                                                                                                                                                                                                                                           | IRB/IEC                                                                                                                                                                                                                                                                            |
|------------------------------------------------------------------------------------------------------------------------------------------------------------------------------------------------------------------------------------------------------------------------------------------------------------------------------------------------------------------------------------------------------------------------------------------------------------------------------------------------------------------------------------------------------------------------------------------------------------------------------------------------------------------------------------------------------------------------------------------------------------------------------------------------------------------------------------------------------------------------------------------------------------------------------------------------------------------------------------|------------------------------------------------------------------------------------------------------------------------------------------------------------------------------------------------------------------------------------------------------------------------------------|
| <p>Avenida 9, calle 17 bis<br/>casa # 1721 Barrio Aranjuez San José, Costa Rica Costa Rica</p>                                                                                                                                                                                                                                                                                                                                                                                                                                                                                                                                                                                                                                                                                                                                                                                                                                                                                     | <p>Comité Ético Científico Universidad de Ciencias Médicas (UCIMED)<br/>[Efraín Artravia Loria, MD], Chairman De la POPS 400 m Oeste, Carretera vieja a Escazú, Sabana Oeste San José, Costa Rica</p>                                                                              |
| <p>Consultorio Privado<br/>Calle Canadá No. 303 entre Panamá y Nicaragua Colonia Vista Hermosa<br/>C.P. 64020 Monterrey, Nuevo León</p>                                                                                                                                                                                                                                                                                                                                                                                                                                                                                                                                                                                                                                                                                                                                                                                                                                            | <p>[Comité de Ética del Centro de Investigación y Extensión de Ciencias de la Salud del Instituto Tecnológico de Estudios Superiores de Monterrey] [Federico Ramos Ruiz, MD] Chairman<br/>Ave. Morones Prieto # 3000 Colonia los Doctores<br/>C.P. 64710 Monterrey, Nuevo León</p> |
| <p>Hospital Psiquiátrico de Yucatán Calle 116 SN por 59 Colonia Bojorquez<br/>C.P. 97230 Mérida, Yucatán</p>                                                                                                                                                                                                                                                                                                                                                                                                                                                                                                                                                                                                                                                                                                                                                                                                                                                                       | <p>[Comité de Enseñanza, Investigación, Capacitación y Ética] [José Antonio Dorantes y Sansores, MD], Chairman<br/>Calle 116 SN por 59 Colonia Bojorquez<br/>C.P. 97230 Mérida, Yucatán</p>                                                                                        |
| <p>Hospital Psiquiátrico "Fray Bernardino Álvarez"<br/>Niño de Jesús # 2 Colonia Tlalpan<br/>C.P. 14000 México, D.F.</p>                                                                                                                                                                                                                                                                                                                                                                                                                                                                                                                                                                                                                                                                                                                                                                                                                                                           | <p>[Comité de Ética e Investigación Clínica] [Carmen Rojas, MD], Chairman Niño de Jesús # 2<br/>Colonia Tlalpan C.P. 14000 México, D.F.</p>                                                                                                                                        |
| <p>Spitalul Universitar de Psihiatrie "Socola"<br/>,Sos.Bucium Nr. 36 700282 Iasi, Jud. Iasi Romania; Spitalul Clinic de Urgenta Judetean Timisoara, Sectia Psihiatrie Str. I.Vacarescu Nr.21<br/>300182 Timisoara , Jud. Timis Romania; Spitalul Clinic Judetean de Urgenta, Clinica Psihiatrie I<br/>Str. Gh.Marinescu Nr.38 540139 Tg.Mures, Jud. Mures Romania; Spitalul de psihiatrie Titan "Constantin Gorgos" Bd. Nicolae Grigorescu 41 030455 Bucuresti Romania;Spitalul Clinic de Psihiatrie Prof. "Dr. Alex. Obregia" Sos. Berceni Nr.10-12, sector 4 041914 Bucuresti Romania; CMDTA "Nicolae Kretzulescu" Str. Mihai Voda Nr.17<br/>050042 Bucuresti Romania;Spitalul Universitar de Urgenta "Elias" Blvd. Marasti No. 17 sector 1<br/>070622 Bucuresti Romania; Spitalul Judetean, Clinica de Psihiatrie I Str. Victor Babes Nr. 43 400012 Cluj-Napoca, Jud. Cluj Romania; Spitalul de Neuropsihiatrie Str. Bagdasar Nr. 12 550245 Sibiu, Jud. Sibiu<br/>Romania;</p> | <p>Clinical Trials Department- National Medicines Agency /<br/>The National Ethics Committee for the Clinical Trial Study of Medicines<br/>48. Av. Sanatescu St. 011478 Bucharest 1 Romania</p>                                                                                    |

| Site (s)                                                                                                                                                                                                                                                                                                                                                                                                                                                                                                                                                                                                                                                                 | IRB/IEC                                                                                                                                                  |
|--------------------------------------------------------------------------------------------------------------------------------------------------------------------------------------------------------------------------------------------------------------------------------------------------------------------------------------------------------------------------------------------------------------------------------------------------------------------------------------------------------------------------------------------------------------------------------------------------------------------------------------------------------------------------|----------------------------------------------------------------------------------------------------------------------------------------------------------|
| <p>Mental Health Research Center 34, Kashirskoye sh., Moscow 115522 Russia; Bekhterev Psychoneurological Research Institute 3, Bekhterev str., St-Petersburg, 193019 Russia; Samara Psychiatric Hospital 78, Nagornaya str., Samara 443016 Russia; Mental Health Research Center 34, Kashirskoye sh., Moscow 115522 Russia; Moscow City Psychiatric Hospital # 1 2, Zagorodnoe Shosse, Moscow, 113152 Russia; Yaroslavl Region Psychiatric Hospital 6, Zagorodny sad, Yaroslavl 150003 Russia; City Psychiatric hospital #6 13, Nab. Obvodnogo kanala, St-Petersburg 193167 Russia; Serbsky National Research Center 47, Volokolamskoe shosse, Moscow 123367 Russia.</p> | <p>Independent Interdisciplinary Committee on Ethical Expertise of Clinical Studies 51, Leningradsky prospect, Moscow, 125468 Russia</p>                 |
| <p>Inje University Pusan Paik Hospital 633-165, Gaegum-dong, Pusanjingu, Pusan, 614-735 Korea</p>                                                                                                                                                                                                                                                                                                                                                                                                                                                                                                                                                                        | <p>Institutional Review Board Chun, JinHo, M.D, Chairman Inje University Pusan Paik Hospital 633-165, Gaegum-dong, Pusanjingu, Pusan, 614-735 Korea</p>  |
| <p>INHA University Hospital, 7-206, 3-Ka, shinheung-dong, Joong-gu, Incheon, , 400-711, Korea</p>                                                                                                                                                                                                                                                                                                                                                                                                                                                                                                                                                                        | <p>Suh, JunKyu, M.D, Chairman INHA University Hospital 7-206, 3-Ka, shinheung-dong, Joong-gu, Incheon, , 400-711, Korea</p>                              |
| <p>Korea University medical Center 126-1, 5 Ka, Anam-dong, Sungbuk-gu, Seoul, 136-705 Korea</p>                                                                                                                                                                                                                                                                                                                                                                                                                                                                                                                                                                          | <p>Institutional Review Board Chae, YangSeok , M.D, Chairman Korea University medical Center 126-1, 5 Ka, Anam-dong, Sungbukgu, Seoul, 136-705 Korea</p> |
| <p>Chonnam National University Hospital 8 Hak-dong, Dong-gu, Gwangju, 501-757 Korea</p>                                                                                                                                                                                                                                                                                                                                                                                                                                                                                                                                                                                  | <p>Institutional Review Board Won, YoungHo , M.D, Chairman Chonnam National University, Hospital 8 Hak-dong, Dong-gu, Gwangju, 501-757 Korea</p>         |
| <p>30-1, ChungGok3-dong, Kwangjin-gu, Seoul, 143-711 Korea</p>                                                                                                                                                                                                                                                                                                                                                                                                                                                                                                                                                                                                           | <p>Institutional Review Board, Chung, EunKee , M.D, Chairman 30-1, ChungGok3-dong, Kwangjingu, Seoul, 143-711 Korea</p>                                  |
| <p>Flexivest 14 Research Centre, 37 John X Merriman Lane, Oakdale Bellville Cape Town South Africa; Sandton Medi-Clinic Medical Centre Suite 202 North Block Peter Place, Bryanston 2021 Johannesburg South Africa; Vista Clinic 135 Gerhard St Lyttelton Centurion 0146 South Africa; Boithuso Caregivers 110 Madeline Street Florida Johannesburg South Africa</p>                                                                                                                                                                                                                                                                                                     | <p>Pharma-Ethics 123 Amcor Road, Lyttelton Manor. 0157 Centurion South Africa Chairperson Mrs M Haskins BLC, LLB</p>                                     |

| Site (s)                                                                                                                                                                                                                                                                                                                                                                                                                                                                                                                                                                                                                                                                                                                                                                                                                                                                                                                                                                                                                                                                                                                                                        | IRB/IEC                                                                                                                                      |
|-----------------------------------------------------------------------------------------------------------------------------------------------------------------------------------------------------------------------------------------------------------------------------------------------------------------------------------------------------------------------------------------------------------------------------------------------------------------------------------------------------------------------------------------------------------------------------------------------------------------------------------------------------------------------------------------------------------------------------------------------------------------------------------------------------------------------------------------------------------------------------------------------------------------------------------------------------------------------------------------------------------------------------------------------------------------------------------------------------------------------------------------------------------------|----------------------------------------------------------------------------------------------------------------------------------------------|
| Taoyuan Psychiatric Center, 71 Long-Shou Street, Taoyuan city 330 Taiwan                                                                                                                                                                                                                                                                                                                                                                                                                                                                                                                                                                                                                                                                                                                                                                                                                                                                                                                                                                                                                                                                                        | Institutional Review Board, Taoyuan Psychiatric Center, 71 Long-Shou Street, Taoyuan city 330, Taiwan                                        |
| Department of Psychiatry, Chunghua Christian Hospital 135 Nanhsiao Street, Changhua city 500, Taiwan; Jianan Mental Hospital No 80 Lane 870, Jhong-Shan Road, Ren-de Township, Tainan County 717, Taiwan; Department of Psychiatry, Kaohsiung Medical University Hospital 100 Tzyou First Road, Kaohsiung 807, Taiwan                                                                                                                                                                                                                                                                                                                                                                                                                                                                                                                                                                                                                                                                                                                                                                                                                                           | Joint Institutional Review Board 201 Sec. 2 Shih-Pai Road, Taipei 112, Taiwan                                                                |
| Odessa State Medical University, Dept. of Psychiatry 9, Acad. Vorobjeva str. Odessa, 65006 Ukraine; Kiev City Psycho-Neurological Hospital #2 8, Miropolska str. Kiev, 02660 Ukraine; Dnepropetrovsk Regional Clinical Hospital, Dept. of Psychosomatics 14, Oktyabr'skaya Sq. Dnepropetrovsk, 49616 Ukraine; Ukrainian Research Institute of Social, Forensic Psychiatry and Narcology, Dept. of Medical - Social Problems of Mental Disorders Treatment 103, Frunze str., 04080, Kiev, Ukraine; Crimean State Medical University, Dept. of Psychiatry 27, R. Luxemburg str. Simferopol, 95006 Ukraine; Lviv Medical University, Dept. of Psychiatry 95, Kulparkivska str. Lviv, 79021 Ukraine; Institute of Neurology, Psychiatry and Narcology, 46, Acad. Pavlov str. Kharkov, 61068 Ukraine; Dnepropetrovsk Medical Academy, Dept. of Psychiatry of Post- Graduate Faculty 1, Bekhtereva str. Dnepropetrovsk, 49115 Ukraine; Vinnitsa National Medical University, Dept. of Psychiatry 109, Pyrogoва str., 21005, Vinnitsa, Ukraine; Kiev Regional Specialized Psycho-Narcological Medical Association, Vokzalna str., 08631 Glevakha, Kiev region, Ukraine | Central Ethics Commission of the Ministry of Public Health of Ukraine Kornatskyy, Vasyl 5, Narodnogo opolchenia str. 03680 MSP, Kiev Ukraine |

| Site (s)                                                                                                                                                                                                                                                                                                                                                                                                                                                                                                                                                                                                                                                                                                                                                                                                                                                                                                                                                                                                                                                                                                                                                                                                                                                                                                                                                                                                                                                                                                                                                                                                                                                                                                                                                                                                                                                                                                                                                                                                                                                                                                     | IRB/IEC                                                                                                                             |
|--------------------------------------------------------------------------------------------------------------------------------------------------------------------------------------------------------------------------------------------------------------------------------------------------------------------------------------------------------------------------------------------------------------------------------------------------------------------------------------------------------------------------------------------------------------------------------------------------------------------------------------------------------------------------------------------------------------------------------------------------------------------------------------------------------------------------------------------------------------------------------------------------------------------------------------------------------------------------------------------------------------------------------------------------------------------------------------------------------------------------------------------------------------------------------------------------------------------------------------------------------------------------------------------------------------------------------------------------------------------------------------------------------------------------------------------------------------------------------------------------------------------------------------------------------------------------------------------------------------------------------------------------------------------------------------------------------------------------------------------------------------------------------------------------------------------------------------------------------------------------------------------------------------------------------------------------------------------------------------------------------------------------------------------------------------------------------------------------------------|-------------------------------------------------------------------------------------------------------------------------------------|
| <p>IPS Research, 1111 North Lee Suite 400, Oklahoma City, OK 73103 USA; Tri-County Mental Health Mental Retardation Services 1020 Riverwood Court, Building 5 Conroe, TX 77304 USA; Brentwood Research Institute 1002 Highland Ave Suite 400 Shreveport, LA 71101 USA; Saroj Brar, M.D., Inc. 2012-W-25 Suite 405 Cleveland, OH 44113 USA; Neurobehavioral Research Inc 74 Carman Avenue Cedarhurst, NY 11516 USA; Community Clinical Research, Inc. 8334 Cross Park Drive Austin, TX 78754 USA; MedClin Research, Inc. 2639 Miami St. Suite S-20 St. Louis, MO 63118 USA; Clinical Innovations 801 North Tustin Suite 600 Santa Ana, CA 92705 USA; CNS Reasearch Institute, PC CRI Worldwide, LLC 130 White Horse Pike Clementon, NJ 08021 USA; Mid-America Clinical Research, LLC 11115 New Halls Ferry Road Suite 206 St. Louis, MO 63033 USA; K&amp;S Research Services, LLC 801 Scott Street Little Rock, AR 72201 USA; University Hills Clinical Research 102 Decker Drive Ste 250 Suite 250 Irving, TX 75062 USA; Timberlawn Mental Health System 4600 Samuell Blvd Dallas, TX 75228 USA; Precise Clinical Research, Inc. Brentwood Plaza, 3531 Lakeland Drive Suite 1060, Flowood, MS 39232, USA; Brentwood Behavioral Health of MS 3531 Lakeland Dr. Flowood, MS 39232 USA; Berma Research Group, 7150 West 20th Ave, Suite 515, Hialeah, FL 33016 USA; Southern Winds Hospital 4225 West 20 Ave Hialeah, FL 33012; Comprehensive NeuroScience, 11080 E. Artesia Blvd. Suite A Cerritos, CA 90703 USA; Comprehensive NeuroScience 10802 College Place Cerritos, CA 90703 USA; InSite Clinical Research 941 York Drive Suite 205 De Soto, TX 75115 USA; Uptown Research Institute, LLC 1021 W. Lawrence Ave Chicago, IL 60640, USA; Lake Charles Clinical Trials, 2770 3rd Avenue, Suite 340 Lake Charles, LA 70601 USA; Institute for Neuropsychiatry 2829 4th Ave Suite 150 Lake Charles, LA 70601 USA; Medical &amp; Occupational Clinic of Lake Charles 2770 3rd Ave Suite 225 Lake Charles, LA 70601 USA; Lake Charles Memorial Hospital 1701 Oak Park Boulevard Lake Charles, LA 70601 USA</p> | <p>Sterling Institutional Review Board Sally P. Greene, Chairman<br/>6300 Powers Ferry Road Suite 600-351 Atlanta, GA 30339 USA</p> |

**Paliperidone palmitate 3-monthly study (NCT01529515)**

| <b>Site(s)</b>                                                                                                                                                                                                                                              | <b>IRB/IEC</b>                                                                                                                                                                                                                                                                                                                                                                                          |
|-------------------------------------------------------------------------------------------------------------------------------------------------------------------------------------------------------------------------------------------------------------|---------------------------------------------------------------------------------------------------------------------------------------------------------------------------------------------------------------------------------------------------------------------------------------------------------------------------------------------------------------------------------------------------------|
| Municipal Treatment-and-Preventive Incorporation “Regional Clinical Psychiatric Hospital”, Donetsk National Medical University named after M. Gorkyi, Department of Psychiatry, Nargology and Medical Psychology, 19, Odintsova Str. Donetsk, 83008 Ukraine | Ethics Committee of the Municipal Treatment-and-Preventive Incorporation “Regional Clinical Psychiatric Hospital”, Stratovych Y.O., MD 19, Odintsova Str. Donetsk, 83008 Ukraine                                                                                                                                                                                                                        |
| Hospital Permai, Jalan Persiaran Kempas Baru Johor Bahru, Johor, 82100 Malaysia                                                                                                                                                                             | Medical Research and Ethics Committee, Ministry of Health Malaysia<br>Chang, Kian Meng, MD, Chairman<br>Jalan Rumah Sakit, Bangsar Kuala Lumpur, WP, 59000 Malaysia                                                                                                                                                                                                                                     |
| Hospital Universitario “Jose E. Gonzalez” Universidad Autonoma de Nuevo Leon Madero y Gozalitos S/N, Col. Mitras, Monterrey NL, Zip Code 64460 Mexico                                                                                                       | Comité de Etica y Comité de Investigacion de la Facultad de Medicina de la UANL y Hospital Universitario “Jose Eleuterio Gonzalez”<br>Garza, Jose, Gynecologist Subdireccion de Investigacion, Edificio de la Biblioteca Central de la Facultad de Medicina de la UANL, planta baja. Av. Francisco I Madero Pte s/n y Dr. E. Aguirre Pequeño, Col. Mitras Centro, Monterrey N.L, Zip Code 64460, Mexico |
| Centro de Atención e Investigación Cardiovascular del Potosí, S.C Antonio Aguilar 155, Col. Burocratas del Estado, San Luis Potosi, S.L.P Zip Code 78200, Mexico                                                                                            | Comité de Bioetica del Hospital Angeles Centro Medico del Potosi<br>Pierdant, Mauricio, Cardiologist Hospital Centro Medico del Potosi, Antonio Aguilar 155, Col. Burocratas del Estado, San Luis Potosi, Zip Code 78200, Mexico                                                                                                                                                                        |
| Instituto Colombiano del Sistema, Nervioso - Clínica Montserrat, Calle 134 # 17 – 71<br>Bogotá, Colombia                                                                                                                                                    | C.E.I Campo Abierto Ltda, Dr Eduardo de la Roche<br>Cra 53 # 104B- 35 Of 401, Bogota, Colombia                                                                                                                                                                                                                                                                                                          |
| ARETE Proyectos y Administracion, S.C Av. Toluca 585 Local 20, Plaza, Square, Col. Olivar de los Padres,<br>Alvaro Obregon, México D.F, Zip Code 01780, Mexico                                                                                              | Comité de Etica ARETE Martinez, Lucia, Bachelor in Science<br>Av. Vasco de Quiroga 3900 Piso 10 Torre A., Lomas de Santa Fe, Cuajimalpa, Mexico DF, Zip Code 05300, Mexico                                                                                                                                                                                                                              |



| Site(s)                                                                                                                                                                                   | IRB/IEC                                                                                                                                                                              |
|-------------------------------------------------------------------------------------------------------------------------------------------------------------------------------------------|--------------------------------------------------------------------------------------------------------------------------------------------------------------------------------------|
| Sakarya University, Training Research Hospital, Adnan Menderes Street, 54100, Adapazari- Sakarya-Turkey                                                                                   | Dicle University Medical Faculty Ethics Committee                                                                                                                                    |
| Dicle University, Medical Faculty, 21830 Sur-Diyarbakir-Turkey                                                                                                                            | Dicle University Medical Faculty Ethics Committee, 21830, Sur-Diyarbakir- Turkey                                                                                                     |
| Municipal Treatment-and-Preventive Institution " Donetsk City Psycho-Neurological Hospital # 2", department # 8 vil. Rudchansk, Donetsk, 83069 Ukraine                                    | Ethics Committee of the Municipal Treatment-and- Preventive Institution " Donetsk City Psycho- Neurological Hospital # 2" Kramarchuk M.P., MD vil. Rudchansk, Donetsk, 83069 Ukraine |
| SF-Care 369 Pine Street, #218 San Fran cisco, CA, 94104 USA                                                                                                                               | Sterling Institutional Review Board 6300 Powers Ferry Rd. Atlanta, GA, 30339 USA                                                                                                     |
| Kyiv Territorial Medical Incorporation "Psychiatry". Center of Novel Treatment and Rehabilitation of Psychotic disorders 103A, Frunze Str. Kiev, 04080 Ukraine                            | Ethics Commission of theKyiv Territorial Medical Incorporation " Psychiatry" Ignatov M.Y., MD 103A, Frunze Str.Kiev, 04080 Ukraine                                                   |
| Vinnitsya Regional Psychiatric Hospital #2, Departments #6 and #3. Vinnitsya National Medical University named after M.I.Pyrogov v. Berezyne, Medmistechno Vinnitsya reg., 21029, Ukraine | Ethics Committee of the Vinnitsya Regional Psychiatric Hospital #2 Travynska I. B., MD v. Berezyne, Medmistechno Vinnitsya reg., 21029 Ukraine                                       |
| Neurobehavioral Research, Inc 74 Carman Ave Cedarhurst, NY, 11516 USA                                                                                                                     | Sterling Institutional Review Board 6300 Powers Ferry Rd. Atlanta, GA, 30339 USA                                                                                                     |
| Community Clinical Research Inc 8334 Cross Park Dr Austin, TX, 78754 USA                                                                                                                  | Sterling Institutional Review Board 6300 Powers Ferry Rd. Atlanta, GA, 30339 USA                                                                                                     |
| PSYNAPSIS Salud Mental S.A Calle 12 # 16 - 20 Pinares de San Martin Pereira, Risaralda, Colombia                                                                                          | Comité de Ética en Investigación Instituto del Sistema Nervioso de Risaralda Calle 11 # 22 - 35, Pereira, Risaralda Colombia                                                         |
| Railway Clinical Hospital #1 of Kiev Railway station of DTGO "South-Western Railway", Department of pshychoneurology 8A, Kotsyubinskogo Str. Kiev, 01080 Ukraine                          | Ethics Committee of the Railway Clinical Hospital #1 of Kiev Railway station of DTGO "South-Western Railway" Garashchuk A.G., MD 8A, Kotsyubinskogo Str. Kiev, 01080 Ukraine         |
| Cungnam National University, Hospital 282 Munwha-ro. Jung-gu Daejeon,301- 721, Korea                                                                                                      | Cungnam National, University Hospital Institutional Review Board 282 Munwha-ro. Jung-gu Daejeon,301- 721 Korea                                                                       |

| Site(s)                                                                                                                                                                              | IRB/IEC                                                                                                                                                                                                                      |
|--------------------------------------------------------------------------------------------------------------------------------------------------------------------------------------|------------------------------------------------------------------------------------------------------------------------------------------------------------------------------------------------------------------------------|
| FutureSearch Trials of Dallas 5445 La Sierra Dr Ste 101 Dallas, TX, 75231 USA                                                                                                        | Sterling Institutional Review Board<br>6300 Powers Ferry Rd. Atlanta, GA, 30339 USA                                                                                                                                          |
| Municipal Institution "Lviv Regional Psychiatric Hospital", Department # 3 and department # 10 95, Kulparkivska Str. Lviv, 79021 Ukraine                                             | Ethics Committee of the Municipal Institution "Lviv Regional Psychiatric Hospital" Lemyshko O.R., MD 95, Kulparkivska Str. Lviv, 79021 Ukraine                                                                               |
| Filyk Viktor S., MD/380818 State Treatment-and-preventive Institution "Central Clinical Hospital of Ukrzaliznytsya", psychiatry department 5, Balakireva lane Kharkiv, 61018 Ukraine | Ethics Committee of the State Treatment-and- preventive Institution "Central Clinical Hospital of Ukrzaliznytsya" Lebedynets V.V., MD 5, Balakireva lane Kharkiv, 61018 Ukraine                                              |
| Spitalul Clinic Judetean Mures, Sectia Clinica Psihiatrie I Acuti Str. Gheorghe Marinescu, nr. 38, Targu-Mures, Jud. Mures, Romania                                                  | Academia de Stiinte Medicale, Comisia Nationala de Bioetica a Medicamentului si a Dispozitivelor Medicale Chairman Prof. Dr. Dinu Antonescu Address: Soseaua Stefan cel Mare nr. 19-21, Sector 2, 020125, Bucuresti, Romania |
| Centro de Investigaciones y Proyectos CIPNA - LTDA Carrera 45 # 84 - 176 Oficina 101- 201 Barranquilla, Atlántico, Colombia                                                          | Comite de ética en investigación de la Fundación del caribe para la investigación Biomedica. Dr Eusebio Consuegra Cra 50 # 80- 216 2nd floor Barranquilla, Atlántico, Colombia                                               |
| Hospital Bahagia Ulu Kinta Tanjung Rambutan Perak, Ipoh, 31250 Malaysia                                                                                                              | Medical Research and Ethics Committee, Ministry of Health Malaysia Chang, Kian Meng, MD, Chairman Jalan Rumah Sakit, Bangsar Kuala Lumpur, WP, 59000 Malaysia                                                                |
| K&S Professional Services Research Services, LLC 801 Scott St Little Rock, AR, 72201 USA                                                                                             | Sterling Institutional Review Board<br>6300 Powers Ferry Rd. Atlanta, GA, 30339 USA                                                                                                                                          |
| Innovative Clinical Research, Inc. 7481 W. Oakland Park Blvd, Suite 205 Lauderhill, FL, 33319 USA                                                                                    | Sterling Institutional Review Board<br>6300 Powers Ferry Rd. Atlanta, GA, 30339 USA                                                                                                                                          |
| Inha University Hospital 7-206 Sinheung-dong 3-ga, Jung-gu Incheon, 400-712 Korea                                                                                                    | Inha University Hospital Institutional Review Board 7-206 Sinheung-dong 3-ga, Jung-gu Incheon, 400-712 Korea                                                                                                                 |
| Pusan National University Yangsan Hospital 20, Geumo-ro, Mulgeum-eup Yangsan-si, Gyeongsangnam-do, 626-770 Korea                                                                     | Pusan National University Yangsan Hospital Institutional Review Board Lee, SangYeoup / Chairman Shin, YoungIl / Chairman 20, Geumo-ro, Mulgeum-eup Yangsan-si, Gyeongsangnam-do, 626-770 Korea                               |

| Site(s)                                                                                                                                                                                                                                 | IRB/IEC                                                                                                                                                                        |
|-----------------------------------------------------------------------------------------------------------------------------------------------------------------------------------------------------------------------------------------|--------------------------------------------------------------------------------------------------------------------------------------------------------------------------------|
| Municipal Institution of Health Care “Kharkiv Regional Clinical Psychiatric Hospital #3”, departments #1, #3 and # 4 46, Ac. Pavlova Str. Kharkov, 61068 Ukraine                                                                        | Ethics Commission of Municipal Institution of Health Care “Kharkiv Regional Clinical Psychiatric Hospital #3”<br>Kosterev K.V., MD 46, Ac. Pavlova Str. Kharkov, 61068 Ukraine |
| Kosenkova Iryna V., MD/380819 Municipal Institution "Cherkasy Regional Psychiatric Hospital", Departments #11 and #12<br>46, Pavlova Str. Smila, Cherkassy region, 20700 Ukraine                                                        | Ethics Committee of the Municipal Institution "Cherkasy Regional Psychiatric Hospital" Shevchuk V. I., MD<br>46, Pavlova Str. Smila, Cherkassy region, 20700 Ukraine           |
| CRI Lifetree 401 Route 73 North, Suite 100, Marlton, NJ, 08053 USA                                                                                                                                                                      | Sterling Institutional Review Board 6300 Powers Ferry Rd. Atlanta, GA, 30339 USA                                                                                               |
| Precise Research Centers 3531 Lakeland Dr Ste 1060<br>Flowood, MS, 39232 USA                                                                                                                                                            | Sterling Institutional Review Board 6300 Powers Ferry Rd. Atlanta, GA, 30339 USA                                                                                               |
| Alexian Behavioral Health Hospital 1786 Moon Lake Blvd Suite 200<br>Hoffman Estates, IL, 60169 USA                                                                                                                                      | Sterling Institutional Review Board<br>6300 Powers Ferry Rd. Atlanta, GA, 30339 USA                                                                                            |
| Municipal Institution of Health Care “Kharkiv Regional Clinical Psychiatric Hospital #3”, Department of intensive psychiatry. Institute of Neurology, Psychiatry and Narcology of the NAMSU 46, Ac. Pavlova Str. Kharkov, 61068 Ukraine | Ethics Committee of Municipal Institution of Health Care “Kharkiv Regional Clinical Psychiatric Hospital #3”<br>Kosterev K.V., MD 46, Ac. Pavlova Str. Kharkov, 61068 Ukraine  |
| CBH Health, L.L.C 707 Saint Paul St Baltimore, MD, 21202 USA                                                                                                                                                                            | Sterling Institutional Review Board 6300 Powers Ferry Rd. Atlanta, GA, 30339 USA                                                                                               |
| Conciencia S.A.S Carrera 43 A # 1 - 50 Of. 954 Medellín – Antioquia Colombia                                                                                                                                                            | Comité de Etica en Investigación ESE Hospital Mental de Antioquia HOMO Dr. Felicia Daelé Ramos Gil Calle 38 # 55 - 310 Bello – Antioquia Colombia                              |
| Comprehensive Clinical Development 4228 Wisconsin Avenue NW<br>Washington, DC, 20016 USA                                                                                                                                                | Sterling Institutional Review Board<br>6300 Powers Ferry Rd. Atlanta, GA, 30339 USA                                                                                            |
| Institute of Neurology, Psychiatry and Narcology of the NAMSU 46, Ac. Pavlova Str. Kharkov, 61068 Ukraine                                                                                                                               | Ethics Commission of the Institute of Neurology, Psychiatry and Narcology of the NAMSU Tantsura L.M., MD, PhD 46, Ac. Pavlova Str.<br>Kharkov, 61068 Ukraine                   |
| Municipal Institution “Odessa Regional Psychiatric Hospital #2”, departments #16 and #14 1, Centralna sq, Oleksandrivka vil. Odessa, 67513 Ukraine                                                                                      | Ethics Committee of Municipal Institution “Odessa Regional Psychiatric Hospital #2” Burlachenko A.A., MD 1, Centralna sq, Oleksandrivka vil. Odessa, 67513 Ukraine             |

| Site(s)                                                                                                                                                                                                                                                        | IRB/IEC                                                                                                                                                                                                                      |
|----------------------------------------------------------------------------------------------------------------------------------------------------------------------------------------------------------------------------------------------------------------|------------------------------------------------------------------------------------------------------------------------------------------------------------------------------------------------------------------------------|
| Municipal Institution "Lviv Regional Clinical Psychiatric Hospital", Department # 20 95, Kulparkivska Str. Lviv, 79021 Ukraine                                                                                                                                 | Ethics Committee of the Municipal Institution "Lviv Regional Clinical Psychiatric Hospital" Lemishko O.R., MD 95, Kulparkivska Str. Lviv, 79021 Ukraine                                                                      |
| Ivano-Frankivsk Regional Psycho- Neurological Hospital # 3, Department # 8<br>15, Medychna Str. Ivano-Frankivsk, 76014 Ukraine                                                                                                                                 | Ethics Committee of the Ivano-Frankivsk Regional Psycho-Neurological Hospital # 3 Denysenko G. D., MD 15, Medychna Str. Ivano-Frankivsk, 76014 Ukraine                                                                       |
| Centro de Investigaciones del Sistema Nervioso GRUPO CISNE LTDA Carrera 69 # 170 - 40 /70 Bogotá, Colombia                                                                                                                                                     | C.E.I Campo Abierto Ltda Dr Eduardo de la Roche Cra 53 # 104B- 35 Of 401 Bogota, Colombia                                                                                                                                    |
| Spitalul de Psihiatrie "Dr. Gheorghe Preda"<br>Str. Bagdasar nr.12, 550245, Sibiu, Jud. Sibiu, Romania                                                                                                                                                         | Academia de Stiinte Medicale, Comisia Nationala de Bioetica a Medicamentului si a Dispozitivelor Medicale Chairman Prof. Dr. Dinu Antonescu Address: Soseaua Stefan cel Mare nr. 19-21, Sector 2, 020125, Bucuresti, Romania |
| Municipal Institution "Kherson Regional Psychiatric Hospital" of Kherson Regional Council, Department #3 65, G. Hovard Str. Kherson, 73488 Ukraine                                                                                                             | Ethics Committee of Municipal Institution "Kherson Regional Psychiatric Hospital" of Kherson Regional Council Velychko P.D, MD<br>65, G. Hovard Str. Kherson, 73488 Ukraine                                                  |
| Kyiv Territorial Medical Incorporation "Psychiatry", Ukrainian Scientific Research Institute of Social and Forensic Psychiatry and Narcology, Department of Medical and Social Problems in the Therapy of Mental Disorder,103A, Frunze Str.Kyiv, 04080 Ukraine | Ethics Committee of the Kyiv Territorial Medical Incorporation "Psychiatry" Ignatov M. Y., MD<br>103A, Frunze Str. Kyiv, 04080 Ukraine                                                                                       |
| Spitalul Clinic Judetean de Urgenta Arad, Clinica Psihiatrie<br>St. Octavian Goga nr.17, 310022 Arad, Jud. Arad, Romania                                                                                                                                       | Academia de Stiinte Medicale, Comisia Nationala de Bioetica a Medicamentului si a Dispozitivelor Medicale Chairman Prof. Dr. Dinu Antonescu Address: Soseaua Stefan cel Mare nr. 19-21, Sector 2, 020125, Bucuresti, Romania |
| Cotton-O'Neil Clinical Research Center<br>3707 Sw 6Th Ave Topeka, KS, 66606 USA                                                                                                                                                                                | Sterling Institutional Review Board<br>6300 Powers Ferry Rd. Atlanta, GA, 30339 USA                                                                                                                                          |
| Especialidades e Investigación para la Salud; Hospital - Antiguo Hospital Civil de Guadalajara; School - Universidad Autónoma de Guadalajara Lacandones #318 Int 201, Fraccionamiento Monraz, Guadalajara, Jalisco, Zip code 44670, Mexico                     | Unidad de Investigación en Enfermedades Crónico – Degenerativas, SC Aceves, Francisco, MD Colomos #2292, Colonia Providencia, Guadalajara, Jalisco, Zip code 44620, Mexico                                                   |

| Site(s)                                                                                                                                                                                                             | IRB/IEC                                                                                                                                                                                                                      |
|---------------------------------------------------------------------------------------------------------------------------------------------------------------------------------------------------------------------|------------------------------------------------------------------------------------------------------------------------------------------------------------------------------------------------------------------------------|
| Lifetree Clinical Research, 3838 South 700 East, Suite 101 Salt Lake City, UT, 84106 USA                                                                                                                            | Sterling Institutional Review Board. 6300 Powers Ferry Rd. Atlanta, GA, 30339 USA                                                                                                                                            |
| Transcarpathian Regional Narcology Dispensary, Department of psychiatry 39, Elektroavodska Str. Uzhgorod, 88000 Ukraine                                                                                             | Ethics Committee of the Transcarpathian Regional Narcology Dispensary Glagolych S. Y., MD 39, Elektroavodska Str. Uzhgorod, 88000 Ukraine                                                                                    |
| Vinnitsya Regional Psycho- Neurological Hospital named after O.I. Yushchenko, Department of psychiatry and narcology 109, Pyrogova Str. Vinnitsya, 21005 Ukraine                                                    | Ethics Committee of the Vinnitsya Regional Psycho- Neurological Hospital named after O.I. Yushchenko Lytvyenko Y. P., MD 109, Pyrogova Str. Vinnitsya, 21005 Ukraine                                                         |
| Municipal Institution "Lviv Regional Clinical Psycho- Neurological Dispensary", inpatient department # 2, Basarab Str. Lviv, 79017 Ukraine                                                                          | Ethics Committee of the Municipal Institution "Lviv Regional Clinical Psycho- Neurological Dispensary" Pavylchuk L.V., MD 30, Kotsylovskogo Str. Lviv, 79017 Ukraine                                                         |
| Crimean Republican Institution "Psycho-Neurological Dispensary", overnight psychiatric department 6, Parkova Str. Kerch, 98310 Ukraine                                                                              | Ethics Committee of the Crimean Republican Institution "Psycho-Neurological Dispensary" Markov V.O., MD 6, Parkova Str. Kerch, 98310 Ukraine                                                                                 |
| Poltava Regional Clinical Psychiatric Hospital named after O. F. Maltsev, Ukrainian Medical Stomatology Academy, Department of Psychiatry, Narcology and Medical Psychology 1, Medychna Str. Poltava, 36024 Ukraine | Ethics Committee of the Poltava Regional Clinical Psychiatric Hospital named after O. F. Maltsev Savchenko O. V., MD 1, Medychna Str. Poltava, 36024 Ukraine                                                                 |
| Uptown Research Institute, LLC 1021 W Lawrence Ave Chicago, IL, 60640 USA                                                                                                                                           | Sterling Institutional Review Board 6300 Powers Ferry Rd. Atlanta, GA, 30339 USA                                                                                                                                             |
| Spitalul Clinic de Psihiatrie "Socola", Sos. Bucium nr. 36, 700282, Iasi, Jud. Iasi, Romania                                                                                                                        | Academia de Stiinte Medicale, Comisia Nationala de Bioetica a Medicamentului si a Dispozitivelor Medicale Chairman Prof. Dr. Dinu Antonescu Address: Soseaua Stefan cel Mare nr. 19-21, Sector 2, 020125, Bucuresti, Romania |
| Municipal Treatment and Prophylactic Institution "Regional Clinical Psychiatric Hospital", department # 3, 19, Odintsova Str. Donetsk, 83008 Ukraine                                                                | Bioethics Committee of Municipal Treatment and Prophylactic Institution "Regional Clinical Psychiatric Hospital" Stratovych Y.M., MD 19, Odintsova Str. Donetsk, 83008 Ukraine                                               |
| University Malaya Medical Centre (UMMC) Lembah Pantai, 59100 Kuala Lumpur, WP Malaysia                                                                                                                              | Jawatankuasa Etika Perubatan Jabatan Kualiti Looi, Lai Meng, MD, Chairman Lembah Pantai, 59100, Kuala Lumpur, WP                                                                                                             |

| Site(s)                                                                                                                                                                                                                                                                                       | IRB/IEC                                                                                                                                                                                                                      |
|-----------------------------------------------------------------------------------------------------------------------------------------------------------------------------------------------------------------------------------------------------------------------------------------------|------------------------------------------------------------------------------------------------------------------------------------------------------------------------------------------------------------------------------|
| Spitalul Clinic de Urgenta Militar "Dr. Stefan Odobleja" Craiova Str. Caracal nr. 150, Craiova, Jud. Dolj, Romania                                                                                                                                                                            | Academia de Stiinte Medicale, Comisia Nationala de Bioetica a Medicamentului si a Dispozitivelor Medicale Chairman Prof. Dr. Dinu Antonescu Address: Soseaua Stefan cel Mare nr. 19-21, Sector 2, 020125, Bucuresti, Romania |
| Ternopil Regional Municipal Clinical Psycho-Neurological Hospital, psychiatry departments # 2 and # 4; Ternopil State Medical University named after I. Y. Gorbachevskiy, Department of Neurology, Psychiatry, Narcology and Medical Psychology 14, Trolleybusna Str. Ternopil, 46014 Ukraine | Ethics Committee of the Ternopil Regional Municipal Clinical Psycho-Neurological Hospital Bondarenko O. M. , MD 14, Trolleybusna Str. Ternopil, 46014 Ukraine                                                                |
| Ivano-Frankivsk Regional Clinical Psycho-Neurological Hospital # 1, Departments # 1 and # 2, Ivano- Frankivsk National Medical University, Department of Psychiatry, Narcology and Medical Psychology 21, Mlynarska Str. Ivano-Frankivsk, 76010 Ukraine                                       | Ethics Committee of the Ivano-Frankivsk Regional Clinical Psycho-Neurological Hospital # 1 Shpak S. Y., MD 21, Mlynarska Str. Ivano-Frankivsk, 76010 Ukraine                                                                 |
| Municipal Institution "Yevpatoriya City Hospital # 2", psychiatry dispensary department 18, Gogol Str. Yevpatoriya, 97416 Ukraine                                                                                                                                                             | Ethics Committee of the Municipal Institution "Yevpatoriya City Hospital #2" Reshydova R. F., MD 18, Gogol Str. Yevpatoriya, 97416 Ukraine                                                                                   |
| Odessa Regional Psycho-Neurological Dispensary, outpatient department Kanatna Str., 27 Odessa, 65014 Ukraine                                                                                                                                                                                  | Ethics Committee of the Odessa Regional Psycho-Neurological Dispensary Verevka N.B., MD Kanatna Str., 27 Odessa, 65014 Ukraine                                                                                               |
| Hospital Dr Angel Leño Av. Dr Angel Leño #500, colonia Los Robles, Zapopan, Jalisco, Zip code 45200, Mexico                                                                                                                                                                                   | Comité de Ética del Hospital, Dr Angel Leño De la Torre, Jose, Endocrinologist Av. Dr Angel Leño #500, colonia Los Robles, Zapopan, Jalisco, Zip code 45200, Mexico                                                          |
| Municipal Institution of the Kyiv Regional Council "Regional Psycho-Narcological Medical Association" departments #2 and #10 8, Vokzalna Str. Glevakha, 08630 Ukraine                                                                                                                         | Ethics Committee of the Municipal Institution of the Kyiv Regional Council Regional Psycho- Narcological Medical Association Timen M.E., MD 8, Vokzalna Str. Glevakha, 08630 Ukraine                                         |
